# Supplementary material for: Blue ZnSeTe quantum dot light-emitting diodes with low efficiency roll-off enabled by an in situ hybridization of ZnMgO nanoparticles and amino alcohol molecules
Source: Royal Society of Chemistry journal article supplement (doi:10.1039/d4nr01515k), 2024-01-01
Supplement: d4nr01515k1.pdf [file d4nr01515k1.pdf]

## Supporting Information

### **Blue ZnSeTe Quantum Dot Light-Emitting Diodes with Low Efficiency Roll-Off Enabled by *In-situ* Hybridization of ZnMgO Nanoparticles and Amino Alcohol Molecules**

Shaolin Ma,<sup>a,b</sup> Fan Cao,<sup>b</sup> Guohua Jia,<sup>c</sup> Qianqian Wu,<sup>\*b</sup> Sheng Wang,<sup>\*b</sup> and Xuyong Yang<sup>\*b</sup>

a. Shanghai University Microelectronic R&D Center, Shanghai University, Shanghai 201900, P. R. China

b. Key Laboratory of Advanced Display and System Applications of Ministry of Education, Shanghai University, Shanghai 200072, P. R. China.

E-mail: qianqianwu@shu.edu.cn; nanocrystal@shu.edu.cn; yangxy@shu.edu.cn.

c. School of Molecular and Life Sciences, Curtin University, Bentley, WA 6102, Australia

## Experimental section

### Materials

Triethylamine (TOA,  $\geq 99.0\%$ ), oleic acid (OA, 90%), oleylamine (OAm, 70%), diethylzinc ( $\text{Et}_2\text{Zn}$ , 1.0 M in hexane), zinc acetate ( $\text{Zn}(\text{OAc})_2$ , 99.99%), zinc chloride ( $\text{ZnCl}_2$ , anhydrous, 99.95%), sulfur (flakes,  $\geq 99.99\%$ ), selenium (granules, 99.99%), tellurium (99.999%), diphenylphosphine (DPP, 98%), HF (48%), trioctylphosphine (TOP, 97%), Zinc acetate dihydrate ( $>99\%$ ), magnesium acetate tetrahydrate ( $>98\%$ ), TMAH ( $>97\%$ ), dimethyl sulfoxide (DMSO,  $>99.9\%$ ), EA (99%), PA (99%) and BA (99%) were purchased from Sigma Aldrich. Anhydrous ethanol (99.5%), anhydrous methanol (99.5%), and ethyl acetate ( $>99.5\%$ ) were purchased from Acros. PEDOT:PSS and TFB were acquired from Aladdin. Chlorobenzene (99.9%) were purchased from Alfa-Aesar. All chemicals were used without further purification.

### Synthesis of ZnTeSe cores

OA (13.5 mmol) and OAm (9 mmol) were mixed with TOA (50 ml) in a four-neck flask by stirring and heated to 120 °C under vacuum. Then, the temperature was further increased to 240 °C under  $\text{N}_2$  flow (800 ml  $\text{min}^{-1}$ ).  $\text{Et}_2\text{Zn}$  (9 mmol) was added into the reaction medium, and then a mixture of 2 M Se in TOP (4.5 mmol), 0.1 M Te in TOP (0.3 mmol) and DPP (4.5 mmol) was injected quickly to initiate the reaction. During the injection of  $\text{Et}_2\text{Zn}$ , careful manipulation of the pressure under the  $\text{N}_2$  flow was required. After 40 min, the ZnTeSe cores were isolated by centrifugation using ethanol and were dispersed in hexane.

### Synthesis of ZnTeSe/ZnSe/ZnS QDs

$\text{Zn}(\text{OAc})_2$  (4.8 mmol) and OA (9.6 mmol) were mixed with ODE (20 ml) by stirring and heated to 120 °C under vacuum for 2 h. After the atmosphere was transferred to  $\text{N}_2$ , the mixed solution was heated to 300 °C and Se/Te precursors (4.5 mmol Se in 5 mL DPP and 0.3 mmol Te in 3 mL TOP) was injected quickly to the reaction system and kept for 300 °C for 1 hours. For ZnSe and ZnS shell growth, 12 mmol of  $\text{Zn}(\text{OA})_2$  in ODE and 1 M TOP-Se (12 mmol) were added and reacted for 1 h. Subsequently, 12 mmol of  $\text{Zn}(\text{OA})_2$  in ODE and 1 M TOP-S (12 mmol) were added and further reacted for 1 h. The resulting ZnTeSe/ZnSe/ZnS QDs were centrifuged using ethanol and dispersed in octane.

### Synthesis of post-treated ZMO NPs

593 mg of Zn acetate dihydrate and 64.3 mg of Mg acetate tetrahydrate (Zn:Mg = 9:1, molar ratio) were dissolved in 30 mL of DMSO. 10 mL of TMAH solution (0.5 M in ethanol) was added to the Zn:Mg acetate solution, and the mixture solution was stirred for 2 h. After synthesis, the ZMO NPs were precipitated by adding ethyl acetate in a 2:1 ratio to the synthesis mixture and centrifuging. The supernatant was discarded, the dry ZMO NPs were rediluted in ethanol, and 60  $\mu\text{L}$  of ethanolamine was added to help with redispersion and stabilize the colloidal solution. The ZMO NPs were finally washed a second time, and the dry powder was collected and redispersed in ethanol for use.

### Synthesis of *in-situ* hybrid ZMO NPs

593 mg of Zn acetate dihydrate and 64.3 mg of Mg acetate tetrahydrate (Zn:Mg = 9:1, molar ratio) were dissolved in 30 mL of DMSO. Add an appropriate amount of amino alcohol (metal cation: amino alcohol=2:1, molar ratio) to the precursor solution and stir for 5 min. 10 mL of TMAH solution (0.5 M in ethanol) was added to the Zn:Mg acetate solution, and the mixture solution was stirred for 2 h. After synthesis, the ZMO NPs were precipitated by adding ethyl acetate in a 2:1 ratio to the synthesis mixture and centrifuging, and the dry powder was collected and redispersed in ethanol for use.

## **Fabrication of QLEDs**

ITO substrate was cleaned by ultrasonic stirring with detergent, deionized water, acetone, and isopropanol, and then treated with ultraviolet ozone for 30 min. PEDOT:PSS solution was spin-coated at 4000 rpm for 40 s and thermally backed at 150 °C for 15 min. Then, the TFB dissolved in chlorobenzene with a concentration of 10 mg mL<sup>-1</sup> was spin-coated at 3000 rpm and annealed at 120 °C for 20 min. QD solution (15.0 mg mL<sup>-1</sup>, dispersed in n-octane) was spin-coated at 3000 rpm for 40 s and annealed at 80 °C for 10 min. After that, different types of ETL (30 mg mL<sup>-1</sup>) were dynamic-spin-coated on the QDs layer and then annealed at 90 °C for 20 min. Finally, the Al electrode (120 nm) was deposited by thermal evaporation under vacuum of  $\approx 3 \times 10^{-4}$  Pa. For TFB/R/B/ETL QD double layer QLEDs, 3 mg mL<sup>-1</sup> of red QDs and 15 mg mL<sup>-1</sup> of blue QDs were coated with 3000 rpm 40 s annealed at 80 °C, sequentially. Other functional layers were coated as in the regular devices.

## **Characterization**

UV-vis absorption spectroscopy was conducted using a U-3100 spectrophotometer (Hitachi). The PL spectra were measured using an Edinburgh FLS920 PL spectrometer. FTIR analysis was performed with a Thermo Scientific Nicolet iS20 instrument. TEM imaging was carried out using JEM1011 (JEOL) electron microscopes at an operating voltage of 100 kV. XRD analysis was conducted using a Bruker D8 Advance diffractometer. Time-resolved PL measurements were collected using a fluorescence lifetime measurement system (QM/TM/NIR, PTI, America). Elemental analysis was studied using XPS spectrum analysis with a Perkin-Elmer model PHI 5600 instrument. Photoluminescence quantum yield was measured using an Edinburgh fluorescence spectrometer FS5. UPS measurements were performed using a Thermo Fischer ESCALAB 250Xi instrument. The performance of QLEDs was investigated using a Keithley 2400 source meter and a PR-670 Spectra Colorimeter. The half-lifetime of QLEDs was tested using a ZJZCL-1 OLED ageing lifespan test instrument.

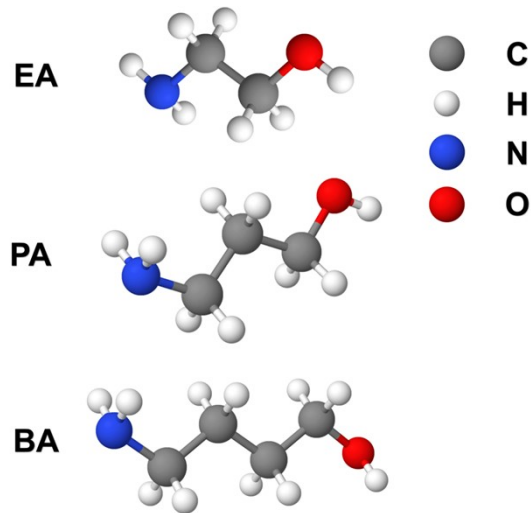

Figure S1. Chemical structure formula of different amino alcohols (EA, PA, BA).

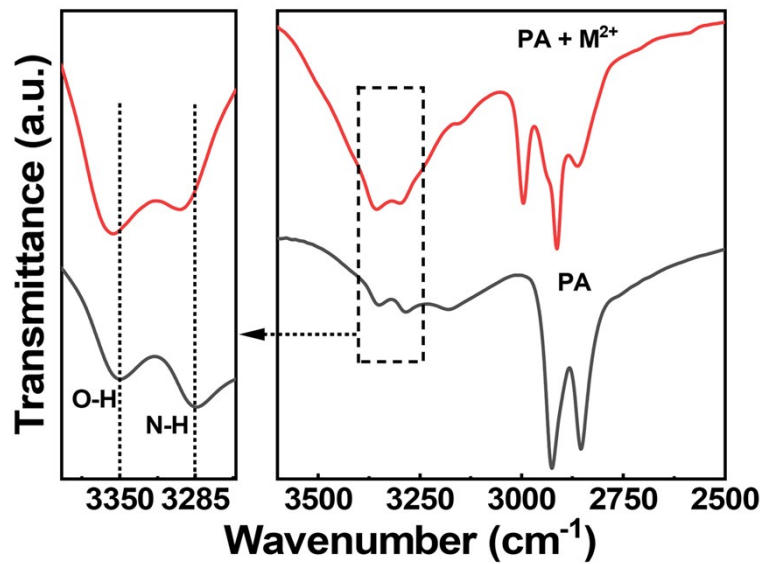

Figure S2. FTIR spectra of PA and  $\text{M}^{2+}$  with PA molecules.

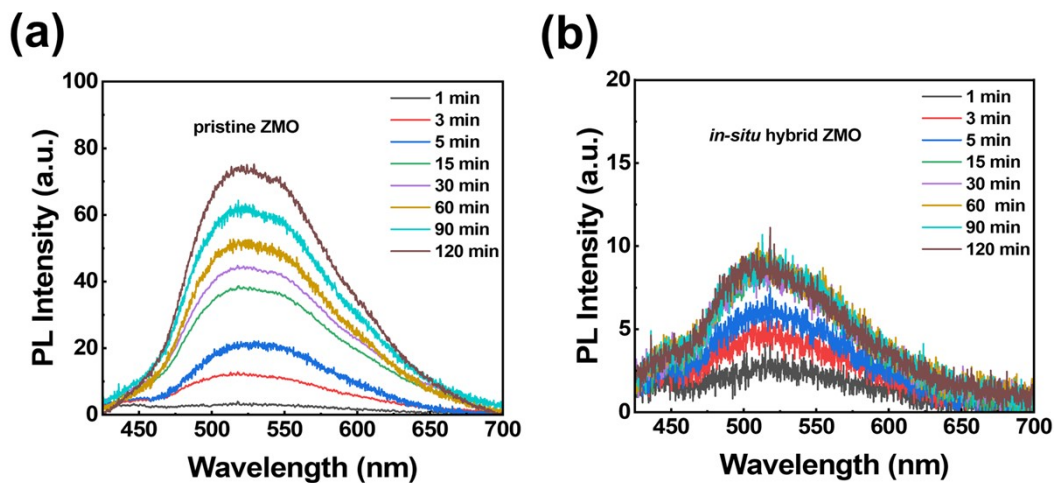

Figure S3. Variation of PL spectra of (a) the pristine ZMO NPs and (b) *in-situ* hybrid

ZMO NPs as a function of reaction time, respectively.

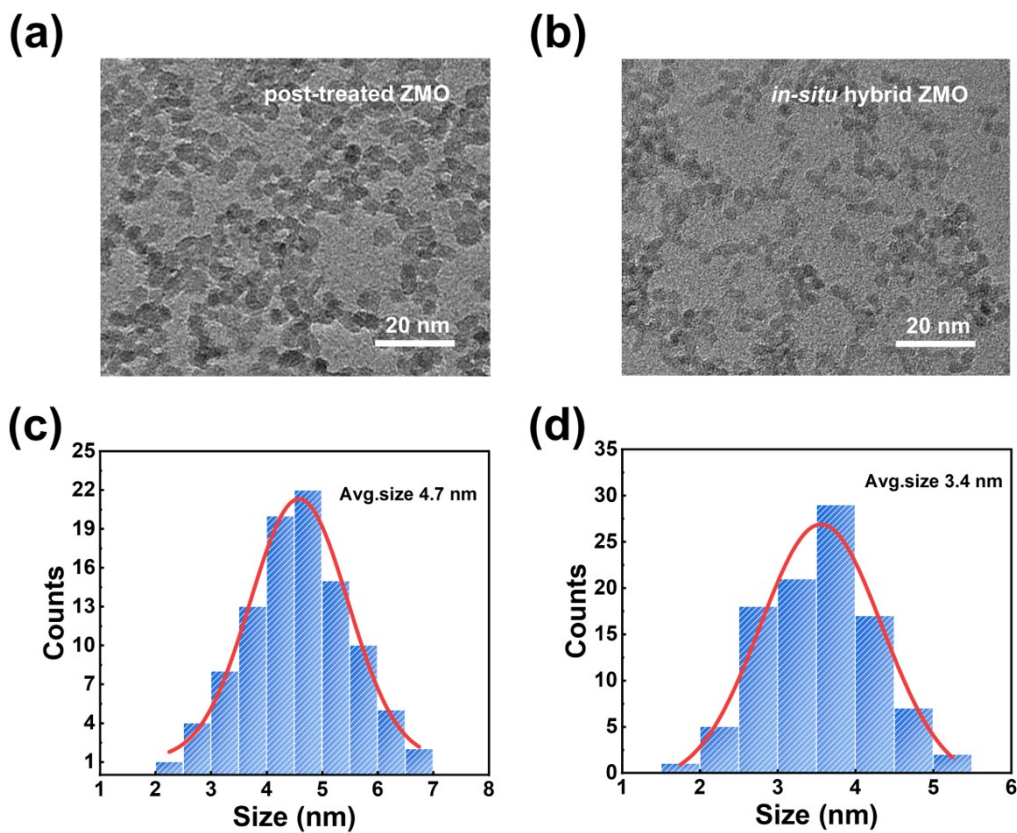

Figure S4. TEM images of (a) the post-treated and (b) *in-situ* hybrid ZMO NPs, respectively. (c) and (d) are the responding size histograms.

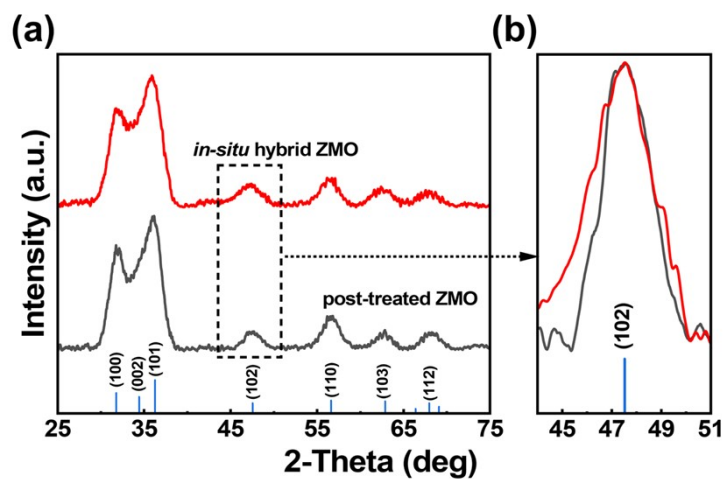

Figure S5. (a) XRD pattern of the post-treated and *in-situ* hybrid ZMO NPs. (b) Zoomed-in views of the diffraction peak at  $\sim 47.5^\circ$  in (a).

Table S1. The exciton lifetime fitting from the time-resolved PL data.

| Sample                               | A <sub>1</sub> (%) | $\tau_1$ (ns) | A <sub>2</sub> (%) | $\tau_2$ (ns) | $\tau_{avg}$ (ns) |
|--------------------------------------|--------------------|---------------|--------------------|---------------|-------------------|
| Glass/QDs                            | 81.1               | 18.5          | 18.9               | 49.2          | 24.30             |
| Glass/post-treated ZMO/QDs           | 89.7               | 6.9           | 10.3               | 22.3          | 8.49              |
| Glass/ <i>in-situ</i> hybrid ZMO/QDs | 86.5               | 10.4          | 13.5               | 34.4          | 13.64             |

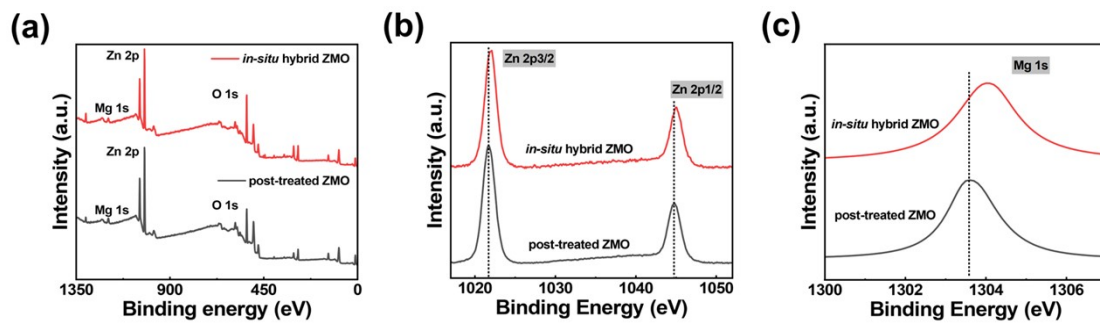

**Figure S6.** XPS spectra of (a) wide scans, (b) Zn 2p and (c) Mg 1s of the post-treated and *in-situ* hybrid ZMO films.

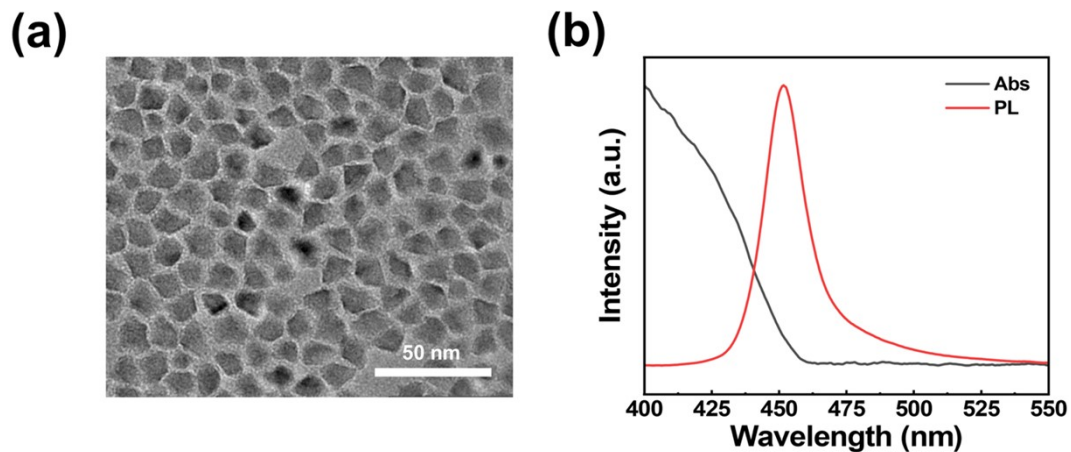

**Figure S7.** (a) TEM image and (b) PL & absorption spectra of blue ZnSeTe QDs.

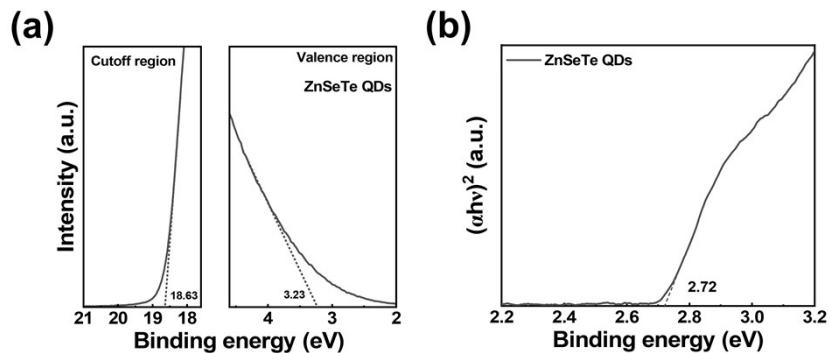

**Figure S8.** (a) UPS spectra of the secondary-electron cut-off region and the valence band edge region of ZnSeTe QDs film. (b) Dependence of  $(\alpha h\nu)^2$  of ZnSeTe QDs film upon the incident photon energy ( $h\nu$ ).

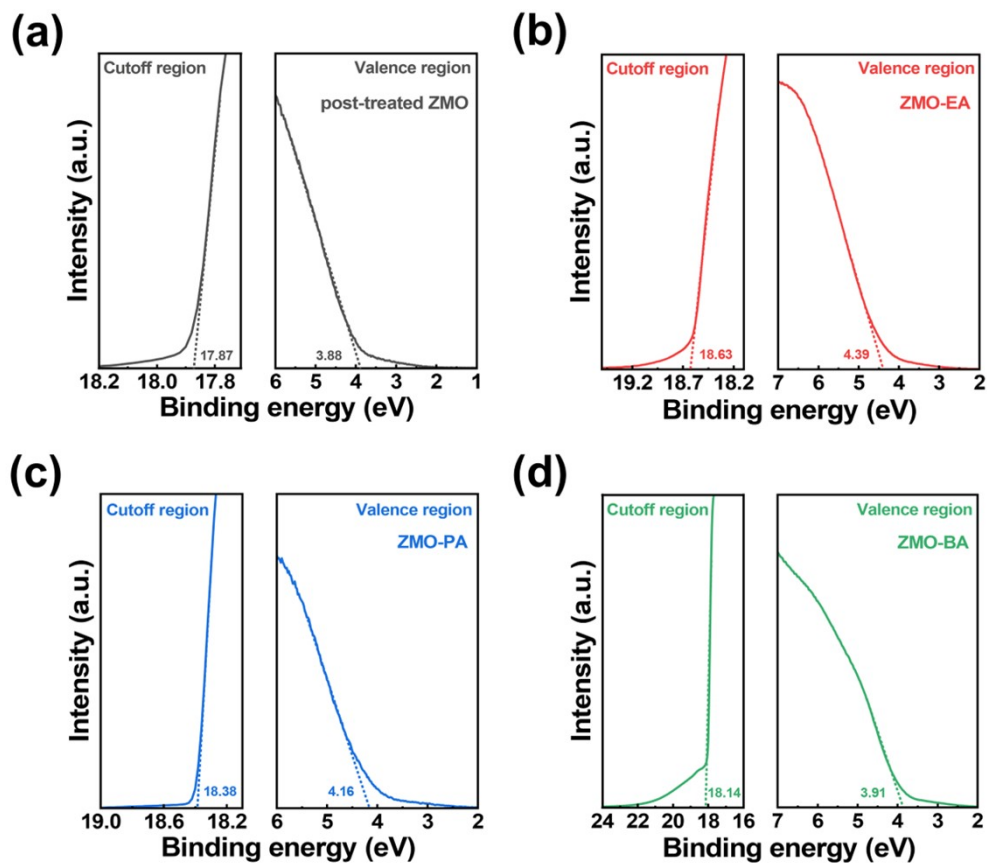

**Figure S9.** UPS spectra of the secondary-electron cut-off region and the valence band edge region of (a) the post-treated ZMO, (b) ZMO-EA, (c) ZMO-PA and (d) ZMO-BA films.

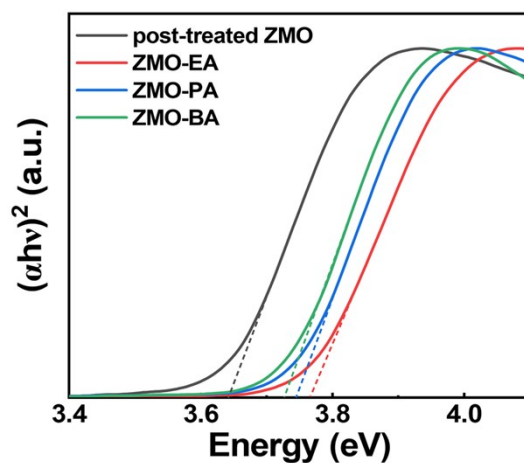

**Figure S10.** Dependence of  $(\alpha hv)^2$  of the post-treated ZMO, ZMO-EA, ZMO-PA and ZMO-BA film upon the incident photon energy ( $h\nu$ ).

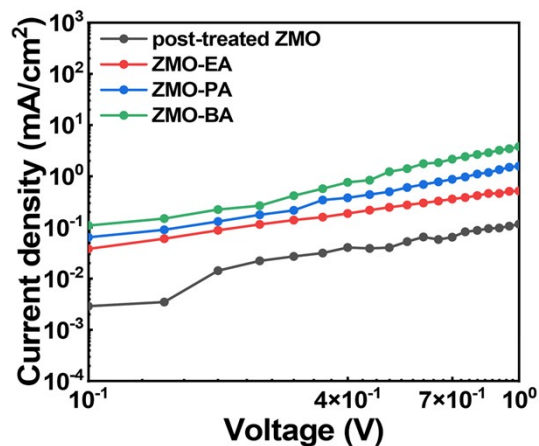

**Figure S11.** Comparison of current density-voltage of EODs integrated with the post-treated ZMO, ZMO-EA, ZMO-PA and ZMO-BA NPs (device structure: ITO/ZMO NPs/QDs/ETL/Al).

**Table S2.** The detailed performance parameters for QLEDs in Figure 3.

| Devices          | V <sub>on</sub> (V) | Max.Luminance (cd m <sup>-2</sup> ) | Max.CE (cd A <sup>-1</sup> ) | Max.EQE (%) | Max.PE (lm W <sup>-1</sup> ) | CIE(x,y)    |
|------------------|---------------------|-------------------------------------|------------------------------|-------------|------------------------------|-------------|
| post-treated ZMO | 3.5                 | 6668                                | 3.6                          | 4.5         | 2.4                          | (0.15,0.06) |
| ZMO-EA           | 2.5                 | 12410                               | 4.5                          | 7.0         | 3.7                          |             |
| ZMO-PA           | 2.5                 | 14125                               | 5.4                          | 8.6         | 4.2                          |             |
| ZMO-BA           | 2.5                 | 13109                               | 4.1                          | 6.7         | 3.9                          |             |

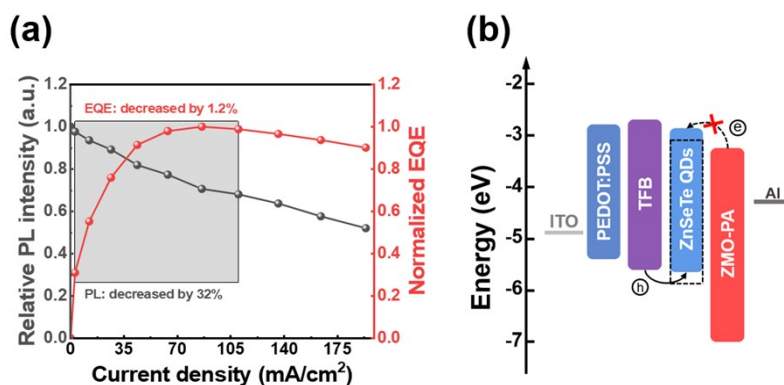

**Figure S12.** (a) EQE and relative PL intensity of the QLED at different current densities. (b) Schematic diagram for charge injection into negatively-charged QDs.



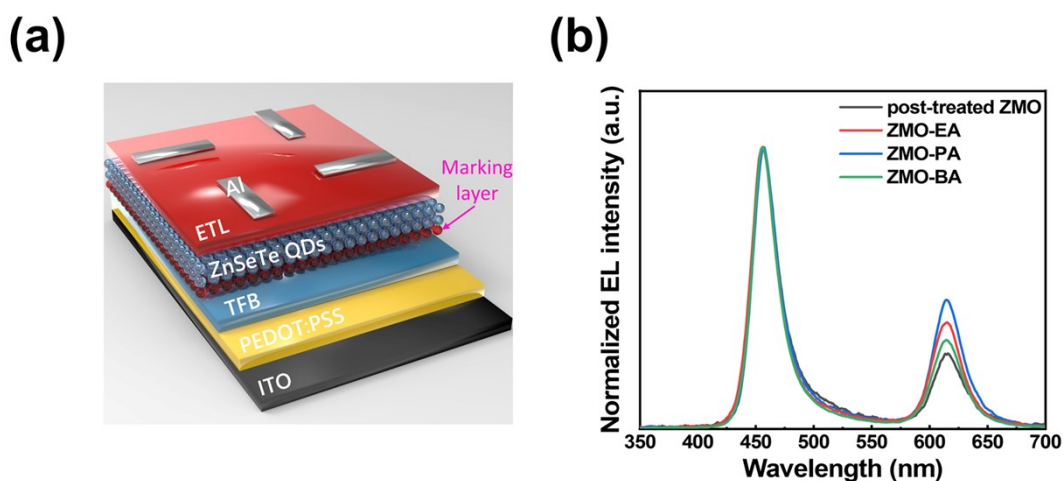

**Figure S13.** (a) Schematic diagram of the device structure with a red QD marking layer. (b) Normalized EL spectra from the QLEDs under  $20 \text{ mA cm}^{-2}$ .

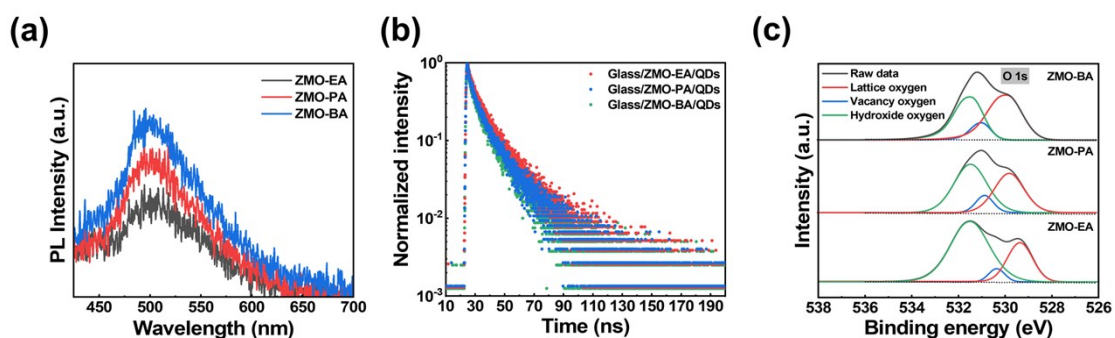

**Figure S14.** (a) PL spectra of ZMO-EA, ZMO-PA and ZMO-BA NPs. (b) time-resolved PL decay profile of ZnSeTe QDs films on different substrates. (c) O 1s XPS spectra of ZMO-EA, ZMO-PA and ZMO-BA films.

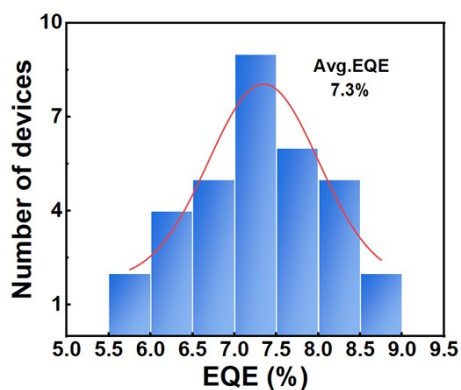

**Figure S15.** Histograms of peak EQEs from 33 QLEDs with MZO-PA.
